# Supplementary material for: Correlation of Aqueous, Vitreous, and Plasma Cytokine Levels in Patients With Proliferative Diabetic Retinopathy
Source: PubMed Central journal article supplement — Invest Ophthalmol Vis Sci. 2020 Feb 21;61(2):26. doi: 10.1167/iovs.61.2.26 (PMC7326572; doi:10.1167/iovs.61.2.26), 2020-02-21
Supplement: iovs-61-2-26_s001.pdf [file iovs-61-2-26_s001.pdf]

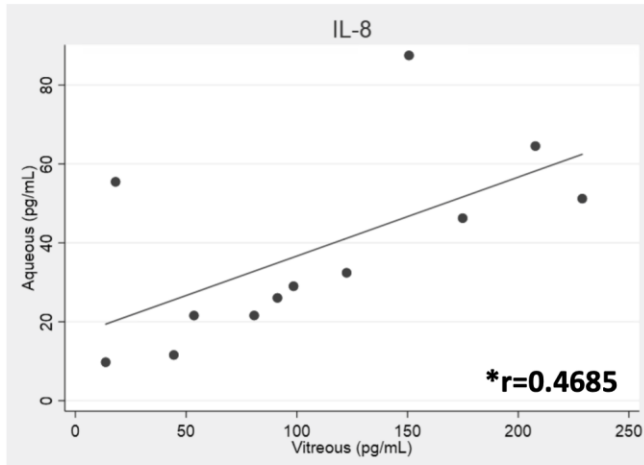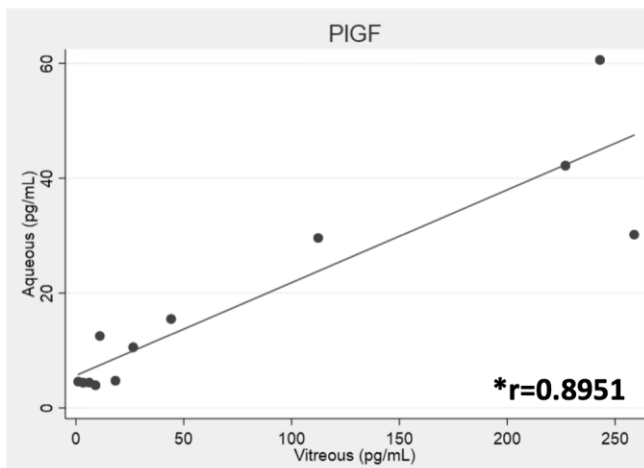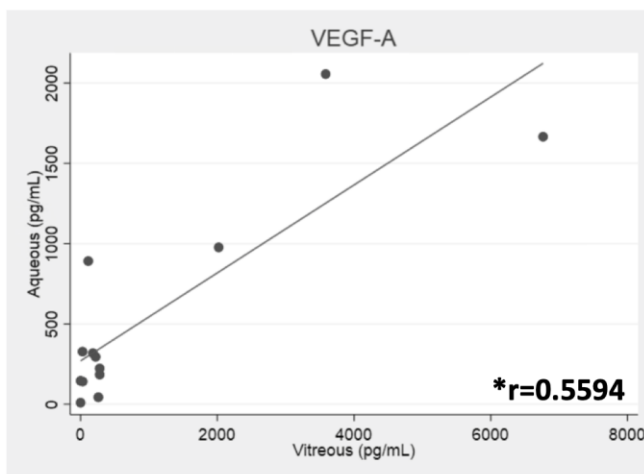

**Supplementary Figure S2: Correlation of vitreous and aqueous factors in phakic patients.** In the subgroup of diabetic patients who had not undergone cataract surgery, the significant correlation between vitreous and aqueous IL-8, PIGF, and VEGF persisted. \*P < 0.05.
