# Supplementary material for: Correlation of Aqueous, Vitreous, and Plasma Cytokine Levels in Patients With Proliferative Diabetic Retinopathy
Source: PubMed Central journal article supplement — Invest Ophthalmol Vis Sci. 2020 Feb 21;61(2):26. doi: 10.1167/iovs.61.2.26 (PMC7326572; doi:10.1167/iovs.61.2.26), 2020-02-21
Supplement: iovs-61-2-26_s002.pdf [file iovs-61-2-26_s002.pdf]

### Cytokine levels in vitreous, aqueous, and plasma

| <b>Vitreous cytokine</b> | Control (pg/mL) (95% CI)<br>n=7 | Diabetic (pg/mL) (95% CI)<br>n=17 | p-value         |
|--------------------------|---------------------------------|-----------------------------------|-----------------|
| IL-6                     | 1.79 (1.13, 2.45)               | 115 (-26.1, 255)                  | <b>0.0003*</b>  |
| IL-8                     | 15.3 (-0.631, 31.2)             | 208 (61.6, 354)                   | <b>0.00048*</b> |
| TNF- $\alpha$            | 0.046 (0.0207, 0.0712)          | 0.219 (0.121, 0.317)              | <b>0.00108*</b> |
| MCP-1                    | 825 (577, 1073)                 | 3225 (2145, 4305)                 | <b>0.0131*</b>  |
| MIP-1 $\beta$            | 11.5 (7.56, 15.5)               | 29.7 (21.4, 37.9)                 | <b>0.0220*</b>  |
| Flt-1                    | 6252 (3969, 8536)               | 9183 (6853, 11513)                | 0.184           |
| PIGF                     | 1.13 (0.434, 1.83)              | 103 (13.0, 193)                   | <b>0.00048*</b> |
| VEGF-A                   | 2.61 (-0.730, 5.94)             | 1799 (-77.9, 3676)                | <b>0.00148*</b> |
| VEGF-C                   | 65.3 (14.0, 116)                | 382 (51.9, 712)                   | 0.327           |
| VEGF-D                   | 45.9 (-26.4, 118)               | 123 (42.6, 203)                   | 0.0703          |

| <b>Aqueous cytokine</b> | Control (pg/mL) (95% CI)<br>n=7 | Diabetic (pg/mL) (95% CI)<br>n=17 | p-value         |
|-------------------------|---------------------------------|-----------------------------------|-----------------|
| IL-6                    | 2.12 (-0.127, 4.36)             | 137 (-68.7, 342)                  | <b>0.0035*</b>  |
| IL-8                    | 9.55 (5.28, 13.8)               | 68.0 (29.6, 106)                  | <b>0.00096*</b> |
| TNF- $\alpha$           | 0.02 (0.02, 0.02)               | 1.03 (-0.0587, 2.11)              | 0.194           |
| MCP-1                   | 7458 (2691, 12225)              | 22867 (5082, 40652)               | 0.749           |
| MIP-1 $\beta$           | 77.2 (33.3, 121)                | 149 (103, 195)                    | 0.0561          |
| Flt-1                   | 550 (370, 729)                  | 1643 (-37.3, 3323)                | 0.569           |
| PIGF                    | 1.34 (0.405, 2.28)              | 20.5 (10.7, 30.3)                 | <b>0.0003*</b>  |
| VEGF-A                  | 208 (147, 270)                  | 656 (265, 1046)                   | 0.342           |
| VEGF-C                  | 9.85 (3.42, 16.3)               | 74.6 (-7.30, 157)                 | <b>0.0131*</b>  |
| VEGF-D                  | 23.6 (1.96, 45.2)               | 45.0 (16.6, 73.5)                 | 0.522           |

| <b>Plasma cytokine</b> | Control (pg/mL) (95% CI)<br>n=7 | Diabetic (pg/mL) (95% CI)<br>n=17 | p-value |
|------------------------|---------------------------------|-----------------------------------|---------|
| IL-6                   | 0.974 (0.54, 1.40)              | 1.12 (0.568, 1.66)                | 0.826   |
| IL-8                   | 5.51 (3.99, 7.03)               | 34.8 (-22.7, 92.2)                | 0.897   |
| TNF- $\alpha$          | 1.77 (1.38, 2.16)               | 3.01 (2.09, 3.92)                 | 0.0751  |
| MCP-1                  | 215 (124, 305)                  | 270 (179, 360)                    | 0.749   |
| MIP-1 $\beta$          | 174 (89.7, 259)                 | 158 (112, 204)                    | 0.952   |
| Flt-1                  | 109 (59.4, 160)                 | 107 (79.3, 135)                   | 0.803   |
| PIGF                   | 5.14 (2.61, 7.67)               | 8.85 (5.77, 11.9)                 | 0.112   |
| VEGF-A                 | 141 (-31.8, 315)                | 168 (74.6, 262)                   | 0.373   |
| VEGF-C                 | 135 (51.3, 219)                 | 140 (102, 178)                    | 0.704   |
| VEGF-D                 | 1377 (1006, 1748)               | 2434 (1757, 3111)                 | 0.0751  |

\* = statistically significant at  $p < 0.05$

**Supplementary Table S1: Identification of cytokine differences in vitreous, aqueous, and plasma from diabetic patients versus controls.** Vitreous IL-6, IL-8, TNF- $\alpha$ , MCP-1, MIP-1 $\beta$ , PIGF, and VEGF-A and aqueous IL-6, IL-8, PIGF, and VEGF-C were elevated in diabetic patients compared to controls. There was no significant

difference in plasma level of any factors between the two groups. Diabetic group includes those with and without recent anti-VEGF injection. \*P < 0.05
